# Supplementary material for: Molybdenum carbide chemical sensors with ultrahigh signal-to-noise ratios and ambient stability
Source: Royal Society of Chemistry journal article supplement (doi:10.1039/c8ta07168c), 2018-01-01
Supplement: c8ta07168c1.pdf [file c8ta07168c1.pdf]

## Supporting Information

### Molybdenum Carbide Chemical Sensor with Ultrahigh Signal-to-Noise Ratio and Ambient Stability

*Soo-Yeon Cho<sup>†,‡,±</sup>, Ju Ye Kim<sup>†,‡,±</sup>, Ohmin Kwon<sup>†</sup>, Jihan Kim<sup>\*,†</sup>, and Hee-Tae Jung<sup>\*,†,‡</sup>*

<sup>†</sup> Prof. H.-T. Jung, Prof. J. Kim, S.-Y. Cho, J. Y. Kim, O. Kwon  
Department of Chemical and Biomolecular Engineering (BK-21 Plus),  
Korea Advanced Institute of Science and Technology (KAIST), Daejeon 34141, Korea,  
E-mail: [heetae@kaist.ac.kr](mailto:heetae@kaist.ac.kr)

<sup>‡</sup> Prof. H.-T. Jung, S.-Y. Cho, J. Y. Kim  
KAIST Institute for NanoCentury, Daejeon 34141, Korea

<sup>±</sup> These authors contributed equally to this work

Keywords: transition metal carbides (TMCs), molybdenum carbides, gas sensors, stability, signal-to-noise ratio (SNR)

Table of contents:

1. Schematic illustrations of the molybdenum carbide synthesis
2. Pore size distribution and BET adsorption graphs
3. Table for BET surface area, pore volume and average pore diameter
4. Supporting calculations about the lattice d-spacing and related angular
5. Schematic illustrations of the gas sensor measurement setup
6. Response time of the sensors to wide concentration of ethanol, NH<sub>3</sub> and NO<sub>2</sub>
7. The real-time NO<sub>2</sub>, NH<sub>3</sub>, C<sub>2</sub>H<sub>5</sub>OH response behavior of the one-year old  $\alpha$ -MoC<sub>1-x</sub> and  $\beta$ -Mo<sub>2</sub>C sensors under the air condition.
8. The resistivity and conductivity measurement of the  $\alpha$ -MoC<sub>1-x</sub> and  $\beta$ -Mo<sub>2</sub>C.

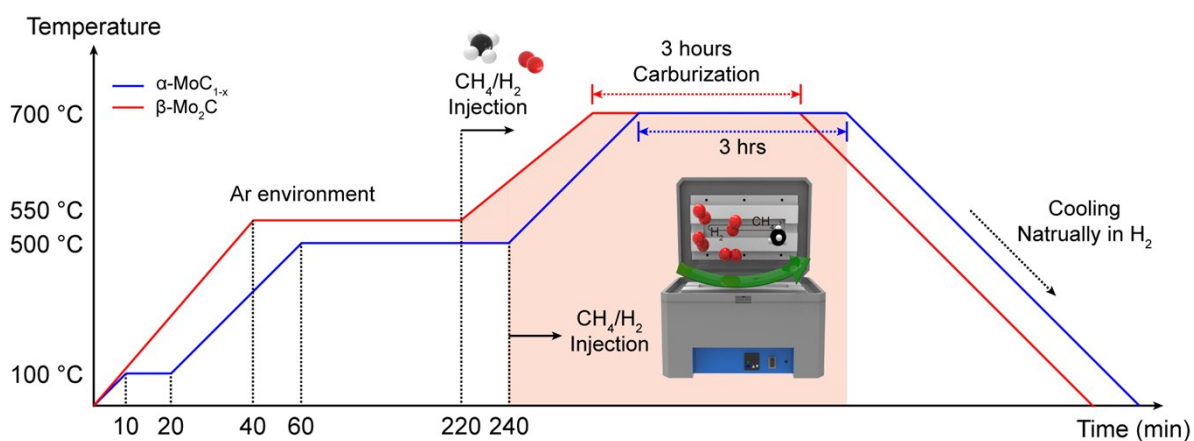

**Figure S1.** Schematic illustration of molybdenum carbide synthesis. x-axis represents reaction time and y-axis shows reaction temperature.

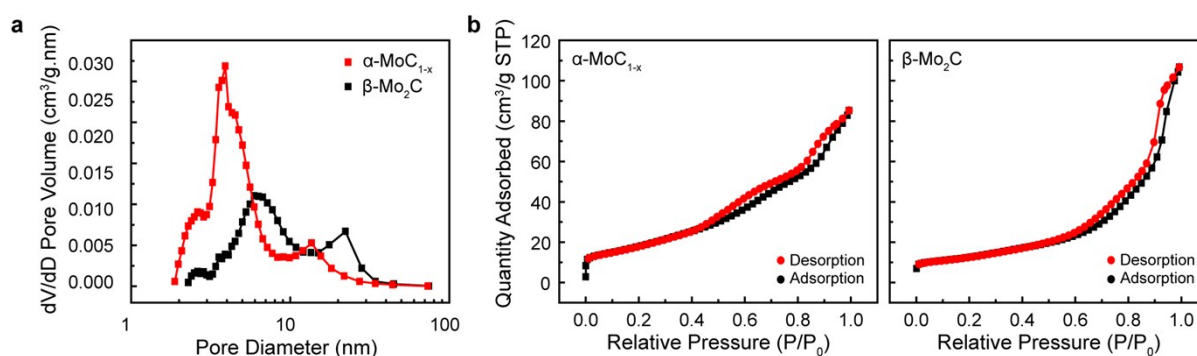

**Figure S2.** (a) Barrett-Joyner-Halenda (BJH) pore size distributions of synthesized molybdenum carbides (represented as differential pore volume against log scale of pore diameter). (b) Nitrogen adsorption isotherm linear plot by Brunauer-Emmett\_Teller (BET) model for two phases of molybdenum carbides

| Material                     | BET Surface Area (m <sup>2</sup> /g) | Pore Volume (cm <sup>3</sup> /g) | Average Pore Diameter (nm) |
|------------------------------|--------------------------------------|----------------------------------|----------------------------|
| Commercial MoC <sub>x</sub>  | 0.6031                               | 0.002324                         | 46.2534                    |
| $\alpha$ -MoC <sub>1-x</sub> | 66.0359                              | 0.138961                         | 6.5202                     |
| $\beta$ -Mo <sub>2</sub> C   | 44.0782                              | 0.171089                         | 11.7959                    |

**Table S1.** The BET surface area, pore volume and average pore diameter information of molybdenum carbides.

## HR-TEM lattice fringe analysis

1. Cubic structure (MoC<sub>1-x</sub>, JCPDS 01-077-7176)

$$a = b = c = 4.244973 \text{ \AA}, \quad \alpha = \beta = \gamma = 90^\circ$$

$$|\vec{a}^*| = |\vec{b}^*| = |\vec{c}^*| = \frac{1}{a}$$

$$d_{hkl} = \frac{a}{\sqrt{h^2 + k^2 + l^2}}$$

$$d_{111} = \frac{4.244973 \text{ \AA}}{\sqrt{3}} = 2.45 \text{ \AA}, \quad d_{220} = \frac{4.244973 \text{ \AA}}{\sqrt{8}} = 1.501 \text{ \AA}$$

$$\cos \emptyset = \frac{h_1 h_2 + k_1 k_2 + l_1 l_2}{\sqrt{h_1^2 + k_1^2 + l_1^2} \sqrt{h_2^2 + k_2^2 + l_2^2}}$$

$$\cos \emptyset = \frac{4}{\sqrt{3}\sqrt{8}} = 0.8165$$

$$\therefore \emptyset = 35.26^\circ$$

2. Orthorhombic structure ( $\beta$ -Mo<sub>2</sub>C, JCPDS 01-077-0720)

$$a \neq b \neq c, \quad a = 6.041758 \text{ \AA}, \quad b = 4.745728 \text{ \AA}, \quad c = 5.214426 \text{ \AA}$$

$$\alpha = \beta = \gamma = 90^\circ$$

$$|\vec{a}^*| = \frac{1}{a}, \quad |\vec{b}^*| = \frac{1}{b}, \quad |\vec{c}^*| = \frac{1}{c}$$

$$d_{hkl} = \frac{1}{\sqrt{\left(\frac{h}{a}\right)^2 + \left(\frac{k}{b}\right)^2 + \left(\frac{l}{c}\right)^2}}$$

$$d_{020} = \frac{1}{\sqrt{\frac{4}{4.745728^2}}} \text{ \AA} = 2.37 \text{ \AA}$$

$$d_{211} = \frac{1}{\sqrt{\frac{4}{6.041758^2} + \frac{1}{4.745728^2} + \frac{1}{5.214426^2}}} \text{ \AA} = 2.29 \text{ \AA}$$

$$\cos \emptyset = \frac{\frac{h_1 h_2}{a^2} + \frac{k_1 k_2}{b^2} + \frac{l_1 l_2}{c^2}}{\sqrt{\frac{h_1^2}{a^2} + \frac{k_1^2}{b^2} + \frac{l_1^2}{c^2}} \sqrt{\frac{h_2^2}{a^2} + \frac{k_2^2}{b^2} + \frac{l_2^2}{c^2}}}$$

$$\cos \emptyset = \frac{\frac{2}{b^2}}{\sqrt{\frac{4}{b^2}} \sqrt{\frac{4}{a^2} + \frac{1}{b^2} + \frac{1}{c^2}}} = 0.48245$$

$$\therefore \emptyset = 61.15^\circ$$

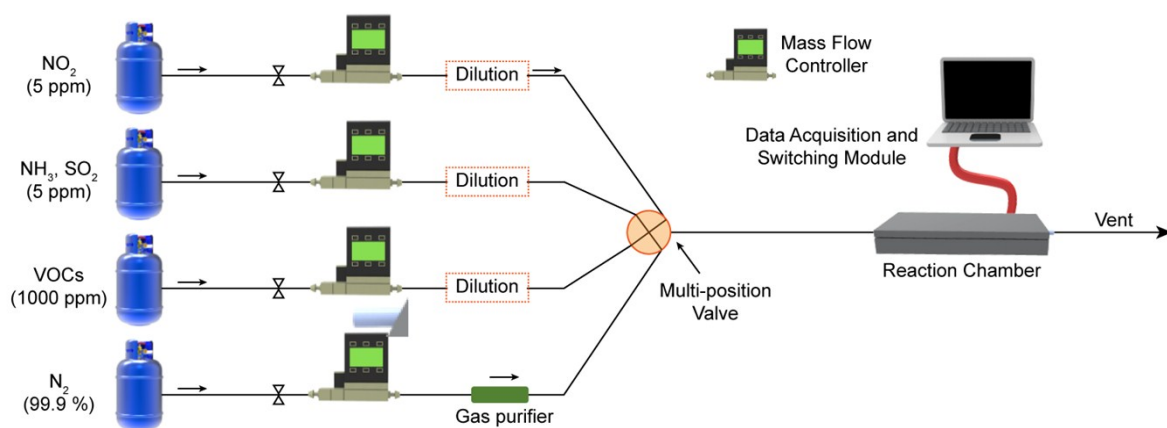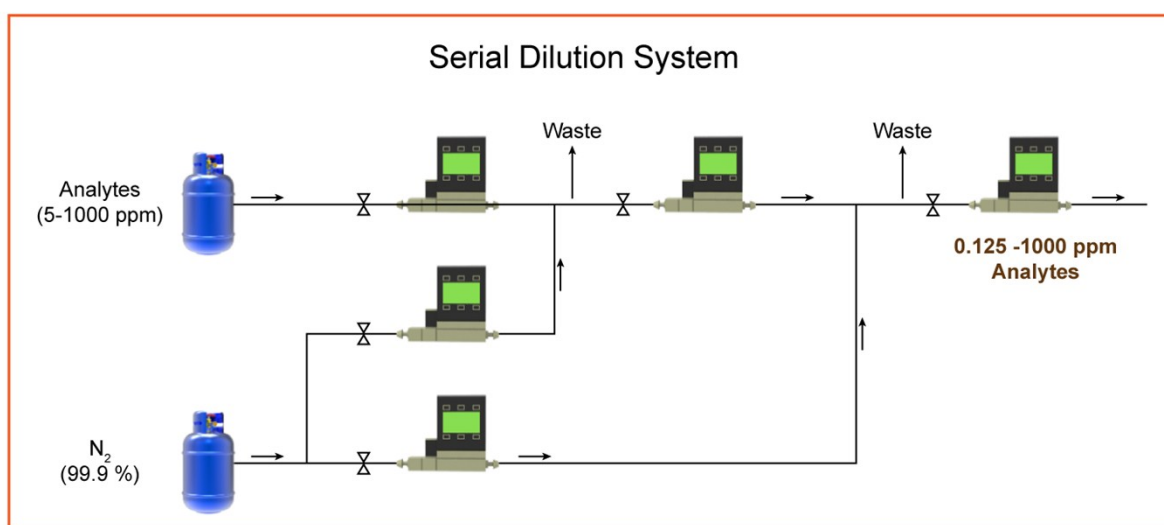

**Figure S3.** Schematic of the overall gas delivery system. Various analytes and  $N_2$  was introduced in a controlled manner into the reaction chamber by using the MFC, tubing system, and multi-position valve. The serial dilution system was also used to obtain 2.5–30000 ppm concentrations of the analyzed gas.

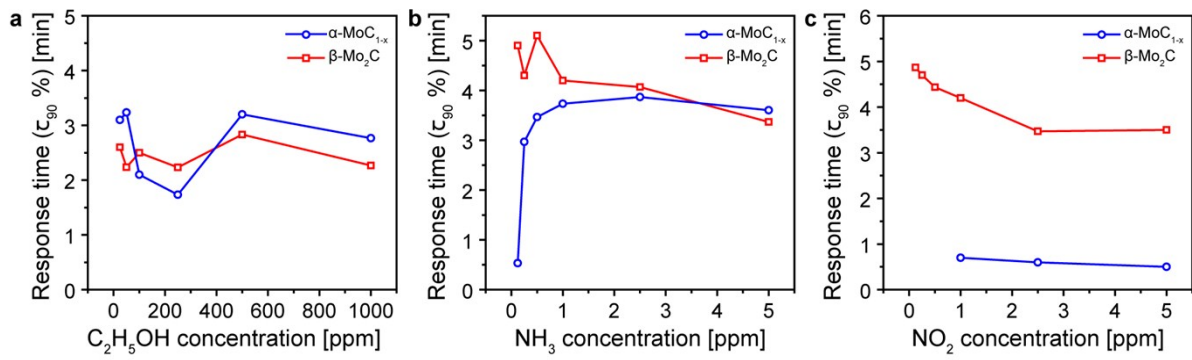

**Figure S4.** Response time of the  $\alpha$ - $\text{MoC}_{1-x}$  and  $\beta$ - $\text{Mo}_2\text{C}$  sensors onto wide concentration range of (a) ethanol, (b)  $\text{NH}_3$  and (c)  $\text{NO}_2$ .

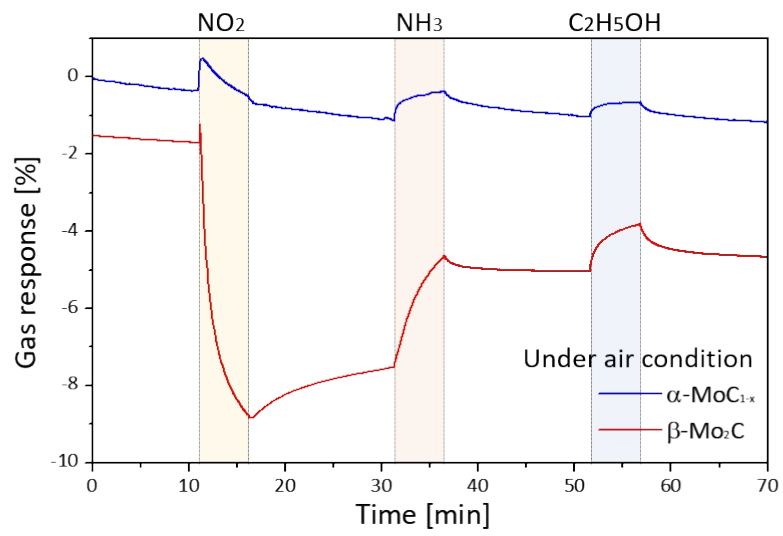

**Figure S5.** The real-time NO<sub>2</sub> (5 ppm), NH<sub>3</sub> (5 ppm), C<sub>2</sub>H<sub>5</sub>OH (1000 ppm) response behavior of the one-year old α-MoC<sub>1-x</sub> and β-Mo<sub>2</sub>C sensors under the air condition.



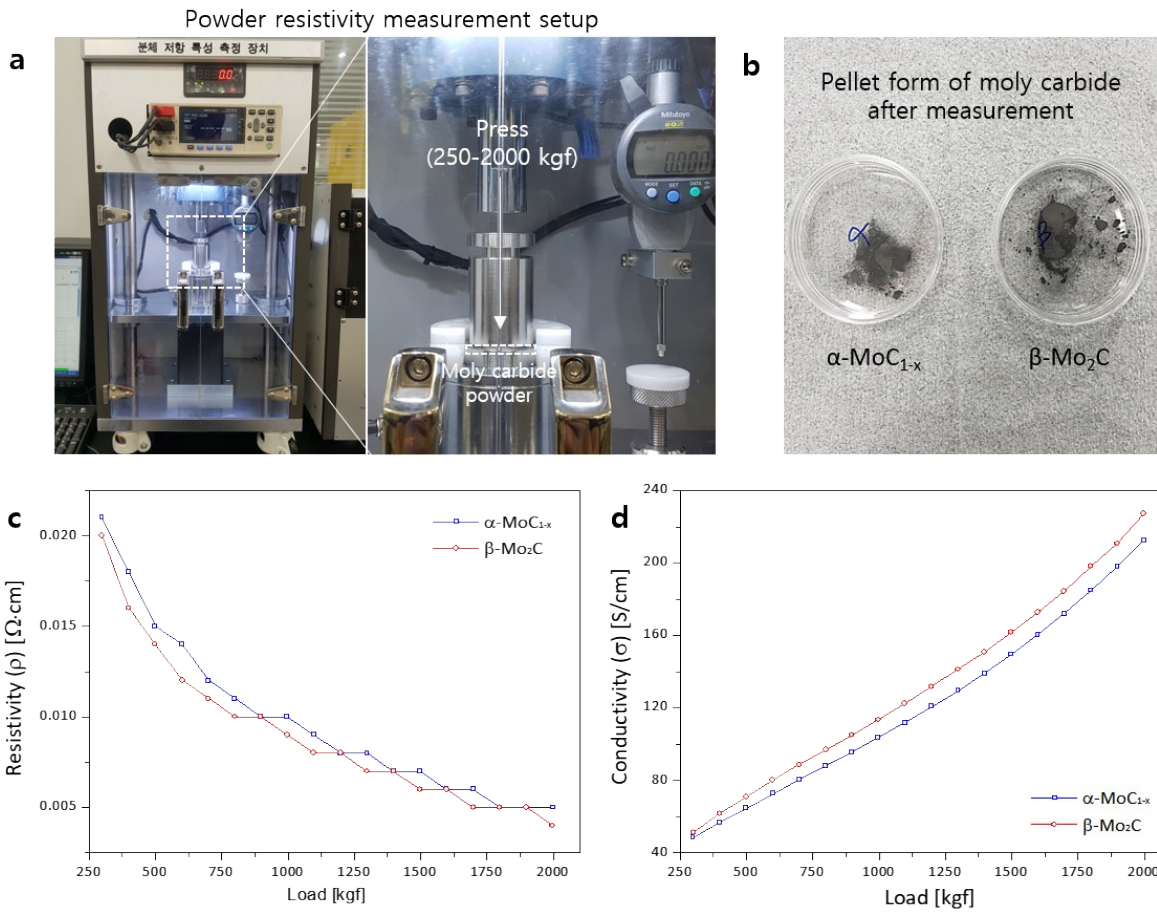

**Figure S6.** (a) Photo-image of the powder resistivity measurement setup (HPRM-M2, HANTECH™). (b) Pellet form of the  $\alpha$ -MoC<sub>1-x</sub> and  $\beta$ -Mo<sub>2</sub>C after measurement with pressing. (c) Resistivity and (d) conductivity of the  $\alpha$ -MoC<sub>1-x</sub> and  $\beta$ -Mo<sub>2</sub>C with varied pressure.
